# Supplementary material for: Label-Free Electrochemical Microfluidic Chip for the Antimicrobial Susceptibility Testing
Source: MDPI journal article supplement (doi:10.3390/antibiotics9060348), 2020-06-20
Supplement: s1 [file s1]

## Supplementary Information

### Label-free electrochemical microfluidic chip for the antimicrobial susceptibility testing

Hyoil Jeon <sup>1,†</sup>, Zeeshan A. Khan <sup>1,†</sup>, Emad Barakat <sup>1</sup> and Seungkyung Park <sup>1,\*</sup>

<sup>1</sup> School of Mechanical Engineering, Korea University of Technology and Education, Cheonan, Chungnam 31253, South Korea

\* Correspondence: spark@koreatech.ac.kr

<sup>†</sup> These authors contributed equally.

Received: 18 May 2020; Accepted: date; Published: date

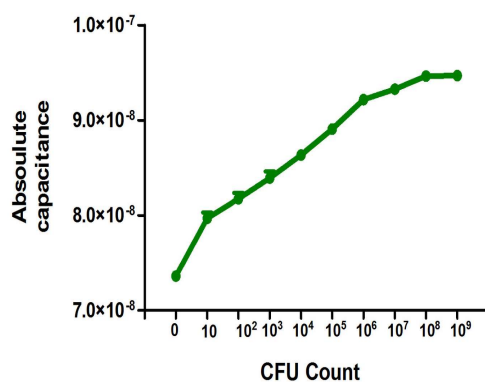

Supplementary Figure 1. Absolute capacitance (Farads) of various CFU of *E. coli*.

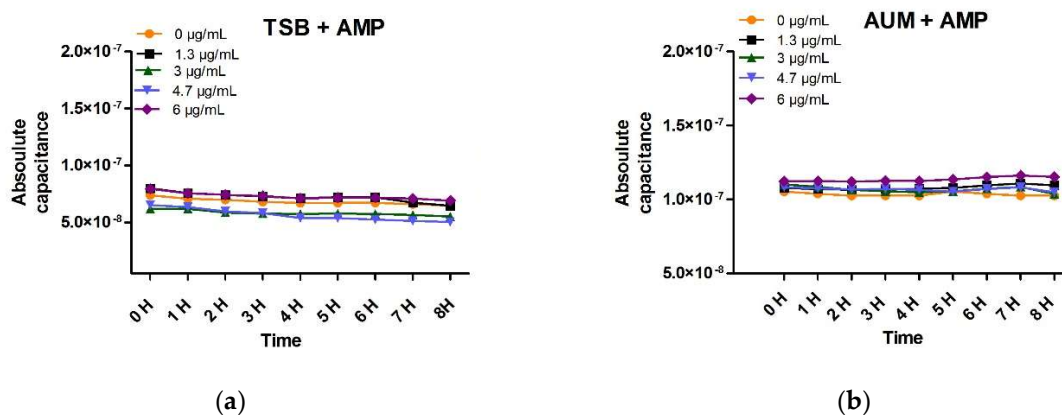

Supplementary Figure 2. Absolute capacitance (Farads) of various concentrations (0, 1.3, 3.0, 4.7 and 6.0 µg/mL) of ampicillin: (a) TSB media; (b) Artificial urine media (AUM).

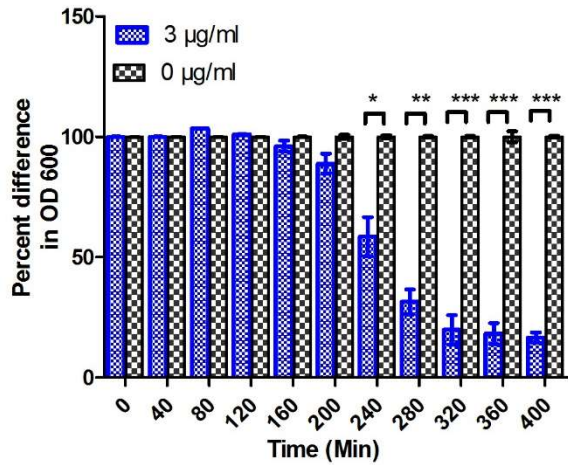

(a)

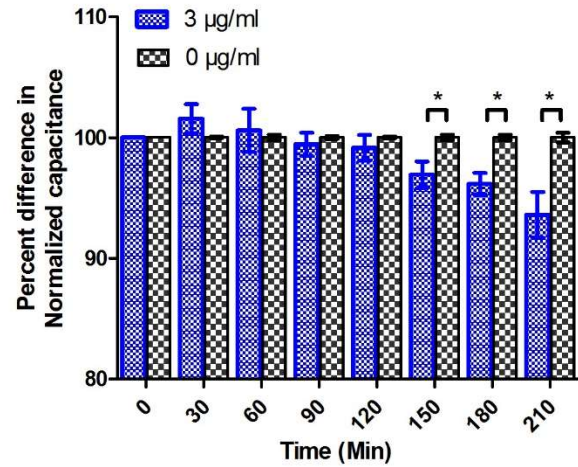

(b)

**Supplementary Figure 3.** Graphs are representing AST in TSB using 3.0 µg/mL ampicillin: (a) The percentage change in the OD600 between control and antibiotic-treated  $10^6$  CFU/mL *E. coli* samples; (b) The percentage change in the normalized capacitance between control and antibiotic-treated  $10^6$  CFU/mL *E. coli* samples. Error bars represent the standard deviation from the mean values of three experiments (significance indicators: \* $p < 0.05$ , \*\* $p < 0.01$ , and \*\*\* $p < 0.001$ ).

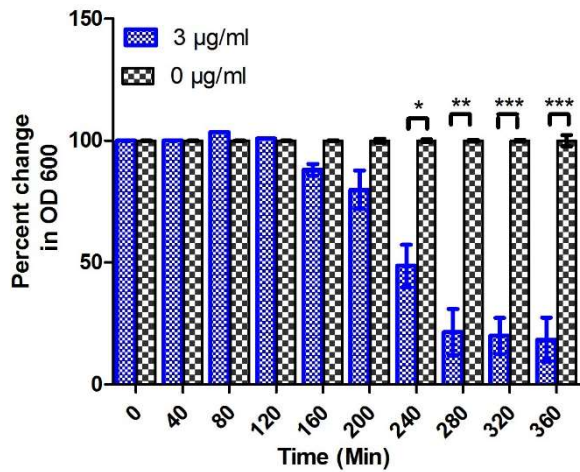

(a)

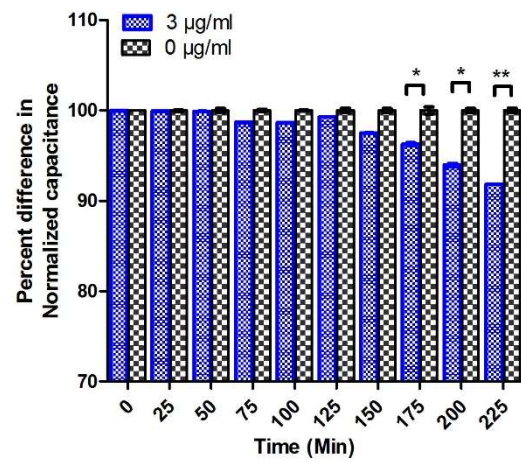

(b)

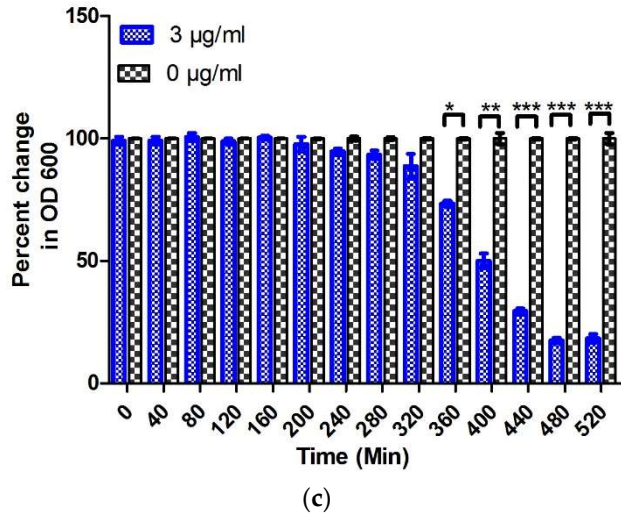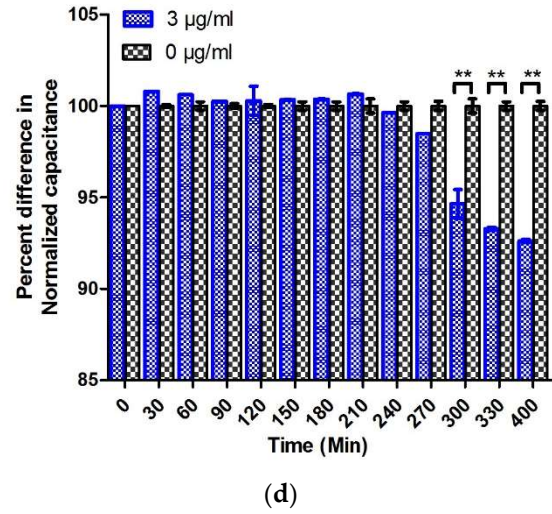

**Supplementary Figure 4.** Graphs are representing AST in the artificial urine samples using 3.0 µg/mL ampicillin: (a) The percentage change in the OD600 between control and antibiotic-treated  $10^6$  CFU/mL *E. coli* samples, (b) The percentage change in the normalized capacitance between control and antibiotic-treated  $10^6$  CFU/mL *E. coli* samples, (c) The percentage change in OD600 between control and antibiotic-treated in  $10^4$  CFU/mL *E. coli* samples; (d) The percentage change in the normalized capacitance between control and antibiotic-treated  $10^4$  CFU/mL *E. coli* samples. Error bars represent the standard deviation from the mean values of three experiments (significance indicators: \* $p < 0.05$ , \*\*  $p < 0.01$ , and \*\*\*  $p < 0.001$ ).
